# Supplementary material
Source: HighWire-hosted journal article supplement (https://jitc.bmj.com/content/9/8/e002746)
Supplement: inline-supplementary-material-24 [file inline-supplementary-material-24.xls]

## Sheet: Sheet1
Name	Primer F（5'-3'）	Primer R（Universal Primer）
hsa-miR-1227-5p	GTGGGGCCAGGCGGTGG
hsa-miR-1253	AGAGAAGAAGATCAGCCTGCA
hsa-miR-125b-2-3p	TCCCTGAGACCCTAACTTGTGA
hsa-miR-1273f	GGAGATGGAGGTTGCAGTG
hsa-miR-1273h-3p	CTGGGAGGTCAAGGCTGCAGT
hsa-miR-1299	TTCTGGAATTCTGTGTGAGGGA
hsa-miR-130a-5p	GCTCTTTTCACATTGTGCTACT
hsa-miR-1343-5p	TGGGGAGCGGCCCCCGGGTGGG
hsa-miR-146b-3p	TGAGAACTGAATTCCATAGGCTG
hsa-miR-149-5p	TCTGGCTCCGTGTCTTCACTCCC
hsa-miR-155-5p	TTAATGCTAATCGTGATAGGGG
hsa-miR-183-3p	TATGGCACTGGTAGAATTCACT
hsa-miR-190a-3p	TGATATGTTTGATATATTAGGT
hsa-miR-203a-3p	CCGGTGAAATGTTTAGGACCA
hsa-miR-2053	GTGTTAATTAAACCTCTATTTAC
hsa-miR-205-3p	GATTTCAGTGGAGTGAAGTTC
hsa-miR-20a-3p	ACTGCATTATGAGCACTTAAAG
hsa-miR-20b-3p	ACTGTAGTATGGGCACTTCCAG
hsa-miR-2110	TTGGGGAAACGGCCGCTGAGTG
hsa-miR-217	TACTGCATCAGGAACTGATTGGA
hsa-miR-222-5p	CTCAGTAGCCAGTGTAGATCCT
hsa-miR-23a-3p	ATCACATTGCCAGGGATTTCC
hsa-miR-23b-3p	ATCACATTGCCAGGGATTACCAC
hsa-miR-23c	ATCACATTGCCAGTGATTACCC
hsa-miR-29a-5p	ACTGATTTCTTTTGGTGTTCAG
hsa-miR-300	TATACAAGGGCAGACTCTCTCT
hsa-miR-3120-5p	CCTGTCTGTGCCTGCTGTACA
hsa-miR-3123	CAGAGAATTGTTTAATC
hsa-miR-3129-5p	GCAGTAGTGTAGAGATTGGTTT
hsa-miR-3162-5p	TTAGGGAGTAGAAGGGTGGGGAG
hsa-miR-3166	CGCAGACAATGCCTACTGGCCTA
hsa-miR-3173-5p	TGCCCTGCCTGTTTTCTCCTTT
hsa-miR-3189-5p	TGCCCCATCTGTGCCCTGGGTA
hsa-miR-3202	TGGAAGGGAGAAGAGCTTTAAT
hsa-miR-335-3p	TTTTTCATTATTGCTCCTGACC
hsa-miR-33a-5p	GTGCATTGTAGTTGCATTGCA
hsa-miR-33b-5p	GTGCATTGCTGTTGCATTGC
hsa-miR-345-5p	GCTGACTCCTAGTCCAGGGCTC
hsa-miR-34a-3p	CAATCAGCAAGTATACTGCCCT
hsa-miR-376c-5p	GGTGGATATTCCTTCTATGTT
hsa-miR-377-3p	ATCACACAAAGGCAACTTTTGT
hsa-miR-378j	ACTGGATTTGGAGCCAGAA
hsa-miR-381-3p	TATACAAGGGCAAGCTCTCTGT
hsa-miR-3908	GAGCAATGTAGGTAGACTGTTT
hsa-miR-3914	AAGGAACCAGAAAATGAGAAGT
hsa-miR-3919	GCAGAGAACAAAGGACTCAGT
hsa-miR-3924	ATATGTATATGTGACTGCTACT
hsa-miR-3942-3p	TTTCAGATAACAGTATTACAT
hsa-miR-4271	GGGGGAAGAAAAGGTGGGG
hsa-miR-4311	GAAAGAGAGCTGAGTGTG
hsa-miR-432-5p	TCTTGGAGTAGGTCATTGGGTG
hsa-miR-4421	ACCTGTCTGTGGAAAGGAGCTA
hsa-miR-4423-5p	AGTTGCCTTTTTGTTCCCATGC
hsa-miR-4452	TTGAATTCTTGGCCTTAAGTGA
hsa-miR-4456	CCTGGTGGCTTCCTTTT
hsa-miR-4462	TGACACGGAGGGTGGCTTGGG
hsa-miR-4503	TTTAAGCAGGAAATAGAATTTA
hsa-miR-4510	TGAGGGAGTAGGATGTATGGTT
hsa-miR-4513	AGACTGACGGCTGGAGGCCCAT
hsa-miR-4528	TCATTATATGTATGATCTGGAC
hsa-miR-4639-5p	TTGCTAAGTAGGCTGAGATTGA
hsa-miR-4653-3p	TGGAGTTAAGGGTTGCTTGGA
hsa-miR-4676-5p	GAGCCAGTGGTGAGACAGTGA
hsa-miR-4677-3p	TCTGTGAGACCAAAGAACTACT
hsa-miR-4692	TCAGGCAGTGTGGGTATCAGAT
hsa-miR-4700-5p	TCTGGGGATGAGGACAGTGTGT
hsa-miR-4704-3p	TCAGTCACATATCTAGTGTCTA
hsa-miR-4725-3p	TGGGGAAGGCGTCAGTGTCGGG
hsa-miR-4726-5p	AGGGCCAGAGGAGCCTGGAGT
hsa-miR-4728-5p	TGGGAGGGGAGAGGCAGCAAG
hsa-miR-4735-5p	CCTAATTTGAACACCTTCGGTA
hsa-miR-4742-5p	TCAGGCAAAGGGATATTTACAG
hsa-miR-4750-3p	CCTGACCCACCCCCTCCCGCAG
hsa-miR-4775	TTAATTTTTTGTTTCGGTCACT
hsa-miR-4777-3p	ATACCTCATCTAGAATGCTGTA
hsa-miR-4782-5p	TTCTGGATATGAAGACAATCAA
hsa-miR-4789-3p	CACACATAGCAGGTGTATATA
hsa-miR-4797-3p	TCTCAGTAAGTGGCACTCTGT
hsa-miR-5011-5p	TATATATACAGCCATGCACTC
hsa-miR-506-5p	TATTCAGGAAGGTGTTACTTAA
hsa-miR-509-3-5p	TACTGCAGACGTGGCAATCATG
hsa-miR-509-5p	TACTGCAGACAGTGGCAATCA
hsa-miR-5193	TCCTCCTCTACCTCATCCCAGT
hsa-miR-541-3p	TGGTGGGCACAGAATCTGGACT
hsa-miR-548ak	AAAAGTAACTGCGGTTTTTGA
hsa-miR-548bb-5p	AAAAGTAACTATGGTTTTTGCC
hsa-miR-548c-3p	CAAAAATCTCAATTACTTTTGC
hsa-miR-548n	CAAAAGTAATTGTGGATTTTGT
hsa-miR-548p	TAGCAAAAACTGCAGTTACTTT
hsa-miR-548w	AAAAGTAACTGCGGTTTTTGC
hsa-miR-550b-2-5p	ATGTGCCTGAGGGAGTAAGACA
hsa-miR-551b-5p	GAAATCAAGCGTGGGTGAGACC
hsa-miR-5580-3p	CACATATGAAGTGAGCCAGCAC
hsa-miR-5580-5p	TGCTGGCTCATTTCATATGTGT
hsa-miR-5589-3p	TGCACATGGCAACCTAGCTCC
hsa-miR-559	TAAAGTAAATATGCACCAAAA
hsa-miR-575	GAGCCAGTTGGACAGGAGC
hsa-miR-578	CTTCTTGTGCTCTAGGATTGT
hsa-miR-579-3p	TTCATTTGGTATAAACCGCGAT
hsa-miR-581	TCTTGTGTTCTCTAGATCAGT
hsa-miR-590-5p	GAGCTTATTCATAAAAGTGCA
hsa-miR-6124	GGGAAAAGGAAGGGGGAGGA
hsa-miR-6127	TGAGGGAGTGGGTGGGAGG
hsa-miR-6129	TGAGGGAGTTGGGTGTATA
hsa-miR-6130	TGAGGGAGTGGATTGTATG
hsa-miR-664b-3p	TTCATTTGCCTCCCAGCCTACA
hsa-miR-6732-3p	TAACCCTGTCCTCTCCCTCCCA
hsa-miR-6734-5p	TTGAGGGGAGAATGAGGTGGAG
hsa-miR-6740-5p	AGTTTGGGATGGAGAGAGGAGA
hsa-miR-6751-5p	TTGGGGGTGAGGTTGGTGTCTG
hsa-miR-6762-3p	TGGCTGCTTCCCTTGGTCTCCA
hsa-miR-6764-5p	TCCCAGGGTCTGGTCAGAGTTG
hsa-miR-6765-3p	TCACCTGGCTGGCCCGCCCAG
hsa-miR-6770-5p	TGAGAAGGCACAGCTTGCACGT
hsa-miR-6773-5p	TTGGGCCCAGGAGTAAACAGGA
hsa-miR-6780b-5p	TGGGGAAGGCTTGGCAGGGAAG
hsa-miR-6785-5p	TGGGAGGGCGTGGATGATGGTG
hsa-miR-6792-3p	CTCCTCCACAGCCCCTGCTCAT
hsa-miR-6799-3p	TGCCCTGCATGGTGTCCCCACAG
hsa-miR-6807-3p	CACTGCATTCCTGCTTGGCCCA
hsa-miR-6810-5p	ATGGGGACAGGGATCAGCATGGC
hsa-miR-6814-5p	TCCCAAGGGTGAGATGCTGCCA
hsa-miR-6829-5p	TGGGCTGCTGAGAAGGGGCA
hsa-miR-6839-5p	TCTGGATTGAAGAGACGACCCA
hsa-miR-6849-5p	GAGTGGATAGGGGAGTGTGTGG
hsa-miR-6855-3p	AGACTGACCTTCAACCCCACAG
hsa-miR-6858-3p	CAGCCAGCCCCTGCTCACCCCT
hsa-miR-6883-5p	AGGGAGGGTGTGGTATGGATGT
hsa-miR-6889-3p	TCTGTGCCCCTACTTCCCAG
hsa-miR-7161-3p	TAGATCTTTGACTCTGGCAGT
hsa-miR-744-3p	CTGTTGCCACTAACCTCAACCT
hsa-miR-7856-5p	TTTTAAGGACACTGAGGGATC
hsa-miR-8068	TGTTTGTTGTAAGGATCGTTGT
hsa-miR-875-5p	TATACCTCAGTTTTATCAGGTG
hsa-miR-939-5p	TGGGGAGCTGAGGCTCTGGGGG
hsa-miR-943	CTGACTGTTGCCGTCCTCCAG
hsa-miR-944	AAATTATTGTACATCGGATGAG
hsa-miR-98-3p	CTATACAACTTACTACTTTCCC
